# Supplementary material for: Numerical magnitude, rather than individual bias, explains spatial numerical association in newborn chicks
Source: eLife. 2020 Jun 25;9:e54662. doi: 10.7554/eLife.54662 (PMC7316507; doi:10.7554/eLife.54662)
Supplement: Source data 4. [file elife-54662-data4.csv]

tipo	dato
LNB	20
LNB	20
LNB	0
LNB	20
LNB	20
LNB	40
LNB	60
LNB	40
LNB	60
LNB	20
LNB	0
LNB	20
LNB	20
LNB	0
LNB	0
LNB	40
LNB	40
LNB	20
LNB	0
LNB	60
LNB	40
LNB	60
LNB	-40
LNB	20
chance	0
chance	0
chance	0
chance	0
chance	0
chance	0
chance	0
chance	0
chance	0
chance	0
chance	0
chance	0
chance	0
chance	0
chance	0
chance	0
chance	0
chance	0
chance	0
chance	0
chance	0
chance	0
chance	0
chance	0
