# Supplementary material for: Numerical magnitude, rather than individual bias, explains spatial numerical association in newborn chicks
Source: eLife. 2020 Jun 25;9:e54662. doi: 10.7554/eLife.54662 (PMC7316507; doi:10.7554/eLife.54662)
Supplement: Source data 6. [file elife-54662-data6.csv]

test	data
2vs2	60
2vs2	60
2vs2	80
2vs2	60
2vs2	40
2vs2	20
2vs2	40
2vs2	100
2vs2	40
2vs2	100
2vs2	40
2vs2	80
2vs2	60
2vs2	40
2vs2	100
2vs2	40
2vs2	100
2vs2	100
2vs2	80
2vs2	100
2vs2	80
2vs2	100
2vs2	100
2vs2	60
5vs5	60
5vs5	80
5vs5	60
5vs5	40
5vs5	20
5vs5	40
5vs5	40
5vs5	100
5vs5	40
5vs5	60
5vs5	60
5vs5	80
5vs5	60
5vs5	40
5vs5	80
5vs5	80
5vs5	40
5vs5	40
5vs5	20
5vs5	40
5vs5	20
5vs5	60
5vs5	0
5vs5	60
8vs8	0
8vs8	20
8vs8	80
8vs8	40
8vs8	40
8vs8	60
8vs8	40
8vs8	20
8vs8	20
8vs8	60
8vs8	20
8vs8	80
8vs8	40
8vs8	0
8vs8	0
8vs8	20
8vs8	60
8vs8	60
8vs8	20
8vs8	40
8vs8	20
8vs8	40
8vs8	0
8vs8	20
