# Supplementary material for: Numerical magnitude, rather than individual bias, explains spatial numerical association in newborn chicks
Source: eLife. 2020 Jun 25;9:e54662. doi: 10.7554/eLife.54662 (PMC7316507; doi:10.7554/eLife.54662)
Supplement: Source data 8. [file elife-54662-data8.csv]

tipo	dato
SNB	0
SNB	20
SNB	-20
SNB	-20
SNB	-20
SNB	20
SNB	0
SNB	0
SNB	0
SNB	-40
SNB	20
SNB	0
SNB	0
SNB	0
SNB	-20
SNB	40
SNB	-60
SNB	-60
SNB	-60
SNB	-60
SNB	-60
SNB	-40
SNB	-100
SNB	0
chance	0
chance	0
chance	0
chance	0
chance	0
chance	0
chance	0
chance	0
chance	0
chance	0
chance	0
chance	0
chance	0
chance	0
chance	0
chance	0
chance	0
chance	0
chance	0
chance	0
chance	0
chance	0
chance	0
chance	0
